# Supplementary material
Source: publisher figshare collection journal article supplement (https://frontiersin.figshare.com/ndownloader/files/14557013)
Supplement: Supplementary file 1 [file 14557013]

	Sphingomonas (Sphingomonadaceae)	Frondihabitans (Microbacteriaceae)	Sphingomonas (Sphingomonadaceae)	Methylobacterium (Methylobacteriaceae)	Arthrobacter (Micrococcaceae)	Unknown (Beijerinckiaceae)	Naxibacter (Oxalobacteraceae)	Actinomycetospora (Pseudonocardiaceae)	Sporosarcina (Planococcaceae)	Janibacter (Intrasporangiaceae)	Methylobacterium (Methylobacteriaceae)	Sporosarcina (Planococcaceae)	Nakamurella (Nakamurellaceae)	Massilia (Oxalobacteraceae)	Unknown (GpI)	Belnapia (Acetobacteraceae)	Belnapia (Acetobacteraceae)	Beijerinckia (Beijerinckiaceae)	Unknown (GpI)	Spirosoma (Cytophagaceae)	Conexibacter (Conexibacteraceae)	Methylobacterium (Methylobacteriaceae)	Methylobacterium (Methylobacteriaceae)	Unknown (Rhodobacteraceae)	Unknown (GpI)	Enhydrobacter (Moraxellaceae)	Curtobacterium (Microbacteriaceae)	Acidisoma (Acetobacteraceae)	Acidisoma (Acetobacteraceae)	Unknown (GpI)	Sphingomonas (Sphingomonadaceae)	Rubellimicrobium (Rhodobacteraceae)	Acidisoma (Acetobacteraceae)	Blastococcus (Geodermatophilaceae)	Skermanella (Rhodospirillaceae)	Truepera (Trueperaceae)	Modestobacter (Geodermatophilaceae)	Modestobacter (Geodermatophilaceae)	Methylobacterium (Methylobacteriaceae)	Acidisoma (Acetobacteraceae)	Asanoa (Micromonosporaceae)	Acidisoma (Acetobacteraceae)	Gluconobacter (Acetobacteraceae)	Gluconobacter (Acetobacteraceae)	Acidisoma (Acetobacteraceae)	Rhizobium (Rhizobiaceae)	Unknown (Acetobacteraceae)	Methylobacterium (Methylobacteriaceae)	Methylobacterium (Methylobacteriaceae)
ABF-9-1	1.17617392244097	0.579981627911166	0.743889479277364	1.23561303337596	1.23020947783642	0.529548442875412	0.4881211837389	1.11853599668582	0.680847997982673	0.461103406041175	0.453898665321782	1.08611466344855	0.960031700859165	0.682649183162521	0.497127109638142	0.52054251697617	0.666438516543886	0.46650696158072	0.446693924602388	1.01947081179416	0.949224589780075	1.0356814784128	0.713269331219943	0.482717628199355	1.53460977323079	NA	NA	NA	NA	NA	NA	NA	NA	NA	NA	NA	NA	NA	NA	NA	NA	NA	NA	NA	NA	NA	NA	NA	NA
BIM-9-1	NA	NA	NA	NA	0.422656908774815	NA	0.293569577030783	NA	NA	NA	NA	0.22694385742096	NA	0.318554221884467	NA	NA	NA	NA	NA	NA	NA	0.293569577030783	NA	NA	NA	1.35437595644344	0.222779749945346	0.948375477571076	1.28983229057142	0.600672503357312	0.257133636619161	0.299815738244204	0.658970008015907	0.379974807149773	0.423697935643719	0.622534067604285	0.300856765113108	0.24776439479903	0.472626198482183	0.342497839869247	0.217574615600829	0.391426102707711	62.5376070956391	0.744334211265993	0.6568879542781	NA	NA	NA	NA
BRA-9-1	2.08159668468812	NA	0.809774453997666	1.91249672517684	0.564460428227785	1.93155024174149	NA	1.20275323314359	NA	NA	0.809774453997666	NA	NA	NA	NA	NA	NA	NA	NA	NA	NA	NA	NA	NA	NA	NA	NA	NA	0.669254769333365	NA	NA	0.701407578536214	NA	NA	NA	NA	NA	NA	NA	NA	NA	NA	NA	NA	NA	2.38526210493724	1.65051087241289	0.534689308595518	0.69545335460976
GRA-9-1	0.729939662944726	NA	NA	NA	2.60593661141549	NA	1.26569110201817	NA	NA	NA	NA	0.847839656009432	NA	1.45294403217976	NA	NA	NA	NA	NA	NA	NA	1.90373812330952	NA	NA	NA	NA	NA	4.61197031694292	1.64539843262362	NA	NA	1.2604896317359	1.99042929468063	2.16207781399542	0.731673486372148	NA	NA	NA	NA	NA	NA	NA	NA	NA	NA	NA	NA	NA	NA
JAS-9-1	1.69808043081734	0.538521671154347	0.898983757491531	1.55693563797446	1.65247980543733	1.23773126031443	0.566750629722922	NA	NA	0.501606879180057	NA	1.44619126205159	NA	0.521150004342917	NA	NA	NA	0.542864587857205	NA	NA	NA	NA	NA	NA	NA	NA	NA	NA	0.482063754017198	NA	0.518978545991488	NA	NA	NA	NA	NA	NA	NA	NA	NA	NA	NA	NA	NA	NA	NA	NA	NA	NA
LAU-9-1	4.00550047850446	1.27895416577625	NA	0.75817406412889	0.85201668726249	NA	0.769788250160276	NA	NA	NA	NA	1.06943424977004	NA	NA	NA	NA	NA	NA	NA	NA	NA	NA	NA	NA	NA	NA	3.48286210709209	NA	NA	NA	0.640638501491261	0.998355431257956	NA	NA	NA	NA	NA	NA	NA	NA	NA	NA	NA	NA	NA	NA	NA	NA	NA
MEL-9-1	1.25042244001352	NA	NA	NA	NA	4.97540460365739	NA	1.21850475010326	NA	NA	NA	NA	NA	NA	NA	NA	NA	0.801697270098757	NA	NA	NA	NA	NA	NA	NA	NA	NA	NA	NA	NA	NA	NA	NA	NA	NA	NA	NA	NA	NA	NA	NA	NA	NA	NA	NA	NA	0.724719312079907	NA	NA
MIC-9-1	2.73334135193649	1.90341592494587	0.64198941544383	NA	2.19960307914361	NA	NA	NA	0.840449843637238	NA	NA	2.15750541255713	NA	NA	NA	0.514192927592014	NA	NA	NA	NA	NA	0.551780129901371	NA	NA	NA	NA	NA	1.44334856867934	1.06898003367813	NA	NA	0.58636035602598	NA	0.844960307914361	NA	NA	0.763771950926149	1.12761606928073	NA	NA	NA	NA	NA	NA	NA	NA	NA	NA	NA
ORG-9-1	1.93375561570444	1.4928704969724	0.775734575996875	0.52738789519212	2.15698858721433	NA	0.711555096687781	NA	NA	NA	NA	1.51240338197952	NA	0.666908502385802	NA	NA	NA	NA	NA	NA	NA	1.16360186399531	NA	NA	NA	NA	NA	3.63032619917962	1.8528336635321	NA	NA	NA	0.747830454558138	NA	NA	NA	NA	NA	NA	NA	NA	NA	NA	NA	NA	NA	NA	NA	NA
SAF-9-1	0.331234385068451	NA	NA	NA	NA	NA	NA	NA	NA	NA	NA	0.338017341759273	NA	NA	NA	NA	NA	NA	NA	NA	NA	0.602552652701313	NA	NA	NA	NA	NA	2.88953955028997	2.10610805250008	0.385498038595024	NA	0.321059950032219	0.920221124388121	0.419412822049131	0.331234385068451	NA	1.0083995613688	0.676034683518546	NA	NA	NA	NA	53.6995376284522	0.697514046372814	NA	NA	NA	NA	NA
SFC-9-1	5.03581542562052	0.921206063634849	0.909545227386307	NA	2.40213226719973	NA	0.559720139930035	NA	1.84574379476928	NA	NA	3.73146759953357	NA	NA	NA	0.623021822422122	0.453106779943362	NA	NA	NA	NA	1.52257204730968	NA	NA	NA	NA	1.07612860236548	0.796268532400466	0.689655172413793	NA	NA	NA	NA	NA	NA	NA	NA	NA	NA	NA	NA	NA	NA	NA	NA	NA	NA	NA	NA
SKI-9-1	0.828717373968144	NA	0.648748841519926	3.407547901804	NA	NA	NA	NA	NA	NA	0.884755479880165	NA	NA	NA	NA	NA	NA	NA	NA	0.850270491626614	NA	0.865357673987542	NA	NA	NA	NA	NA	NA	NA	NA	NA	1.51841713903916	NA	NA	NA	NA	NA	NA	NA	NA	NA	NA	NA	NA	NA	NA	1.23822660947906	NA	NA
TAF-9-1	0.704225352112676	NA	NA	NA	NA	NA	NA	NA	NA	NA	NA	NA	NA	NA	NA	NA	NA	NA	NA	NA	NA	NA	NA	NA	NA	NA	NA	1.39977187066058	0.843086689148978	NA	NA	NA	NA	NA	NA	NA	NA	NA	NA	NA	NA	NA	NA	NA	NA	NA	NA	NA	NA
TRA-9-1	2.34043788837912	1.19054532783553	NA	NA	1.90487252453685	1.88938575604468	0.936949493776255	NA	1.31443947577289	NA	NA	2.19718527982655	NA	0.547844435410496	NA	NA	NA	NA	NA	NA	NA	1.63191822986236	NA	NA	NA	NA	NA	NA	NA	NA	NA	NA	0.669802737286331	NA	NA	NA	NA	NA	NA	NA	NA	NA	NA	NA	NA	NA	1.94358944576727	NA	NA
WEF-9-1	0.81723897826804	0.846556968519808	NA	0.754938248983032	1.2020376003225	4.55894748414996	NA	1.5685124784696	NA	1.00047641734159	NA	0.758602997764503	NA	NA	NA	NA	NA	NA	NA	NA	NA	NA	NA	NA	NA	NA	1.77740315901345	0.630336790413017	NA	NA	NA	NA	NA	NA	NA	NA	NA	NA	NA	NA	NA	NA	NA	NA	NA	NA	2.19884926888262	NA	NA
WES-9-1	1.68198135145508	0.754069491793286	NA	NA	1.00241573160545	NA	0.722461788544465	1.88291603639401	0.817284898290926	NA	NA	1.22366965434719	NA	NA	NA	NA	NA	NA	NA	NA	NA	NA	NA	NA	NA	NA	3.12690492854401	1.98225453231888	1.66166211365227	0.690854085295645	NA	NA	0.623123292619601	NA	NA	NA	NA	NA	NA	NA	NA	NA	NA	NA	NA	NA	NA	NA	NA
[truncated: 161 more columns]
